# Supplementary material for: Bioinspired molecule-functionalized Cu with high CO adsorption for efficient CO electroreduction to acetate
Source: Royal Society of Chemistry journal article supplement (doi:10.1039/d4dt01293c), 2024-01-01
Supplement: d4dt01293c1.pdf [file d4dt01293c1.pdf]

## Supplementary Information

# Bioinspired Molecule Functionalized Cu with Strengthened CO Adsorption for Efficient CO Electroreduction to Acetate

Xuanzhao Lu,<sup>‡a</sup> Baozhen Yuan,<sup>‡a</sup> Yi Liu,<sup>a</sup> Li-Xia Liu<sup>\*b</sup> and Jun-Jie Zhu<sup>\*a</sup>

*<sup>a</sup>State Key Laboratory of Analytical Chemistry for Life Science, School of Chemistry and Chemical Engineering, Nanjing University, Nanjing 210023, China. E-mail: jjzhu@nju.edu.cn*

*<sup>b</sup>Jiangsu Key Laboratory of Green Synthetic Chemistry for Functional Materials, School of Chemistry and Materials Science,*

*Jiangsu Normal University, Xuzhou 221116, China. E-mail: liulixia@jsnu.edu.cn*

<sup>‡</sup>These authors have contributed equally to this work.

|                                            |           |
|--------------------------------------------|-----------|
| <b>1 Supporting figures and table.....</b> | <b>3</b>  |
| <b>Figure S1 .....</b>                     | <b>3</b>  |
| <b>Figure S2 .....</b>                     | <b>3</b>  |
| <b>Figure S3 .....</b>                     | <b>4</b>  |
| <b>Figure S4 .....</b>                     | <b>4</b>  |
| <b>Figure S5 .....</b>                     | <b>5</b>  |
| <b>Figure S6 .....</b>                     | <b>5</b>  |
| <b>Figure S7 .....</b>                     | <b>6</b>  |
| <b>Figure S8 .....</b>                     | <b>6</b>  |
| <b>Figure S9 .....</b>                     | <b>7</b>  |
| <b>Figure S10 .....</b>                    | <b>7</b>  |
| <b>Figure S11 .....</b>                    | <b>8</b>  |
| <b>Figure S12 .....</b>                    | <b>9</b>  |
| <b>Figure S13 .....</b>                    | <b>10</b> |
| <b>Figure S14 .....</b>                    | <b>10</b> |
| <b>Figure S15 .....</b>                    | <b>11</b> |
| <b>Figure S16 .....</b>                    | <b>11</b> |
| <b>Figure S17 .....</b>                    | <b>12</b> |
| <b>Figure S18 .....</b>                    | <b>12</b> |
| <b>Table S1.....</b>                       | <b>13</b> |
| <b>2 Supporting references .....</b>       | <b>14</b> |

# 1 Supporting figures and table

Figure S1

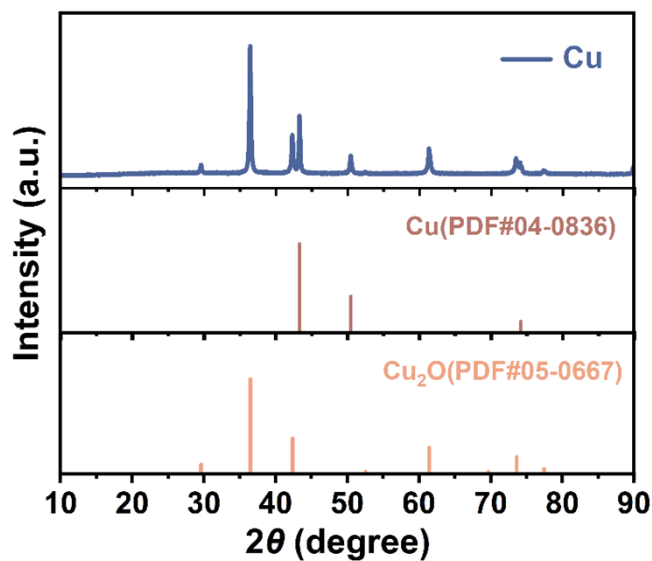

Figure S1. XRD pattern of Cu NPs.

Figure S2

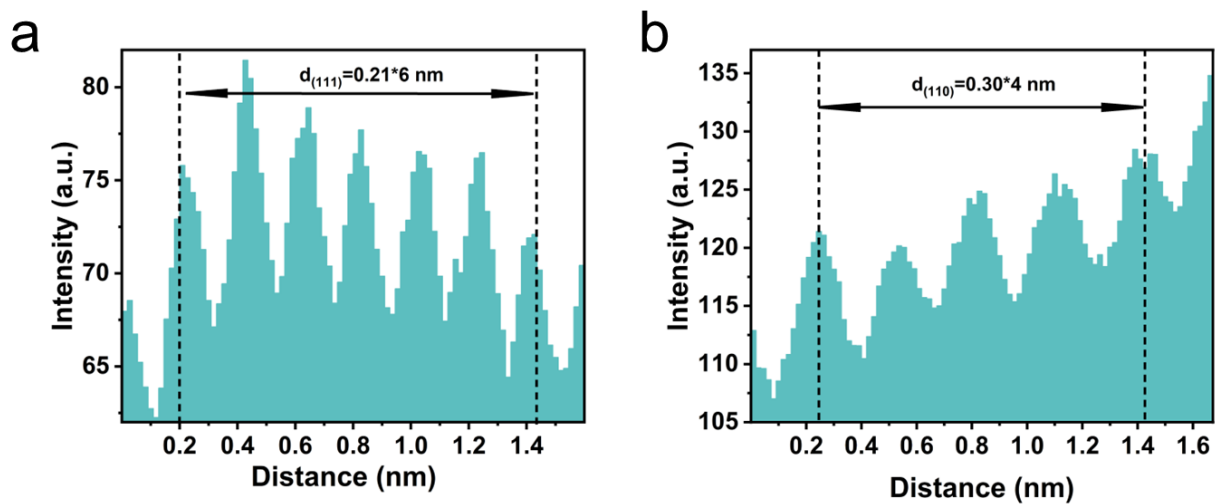

Figure S2. Line-scanning intensity profile from the area highlighted with the green rectangle in Figure 1b.

Figure S3

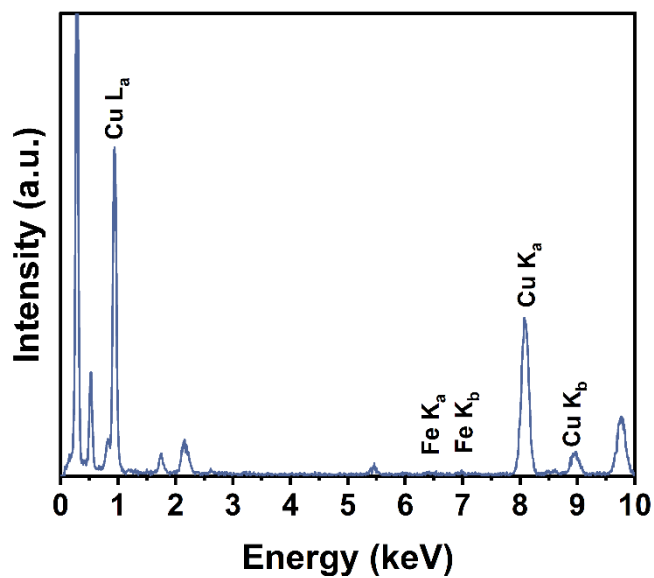

Figure S3. EDS spectrum of Cu NPs.

Figure S4

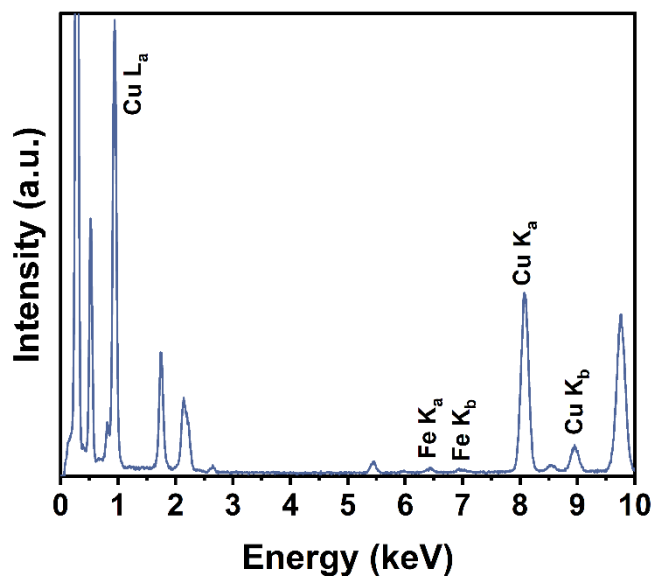

Figure S4. EDS spectrum of hemin/Cu-6.

**Figure S5**

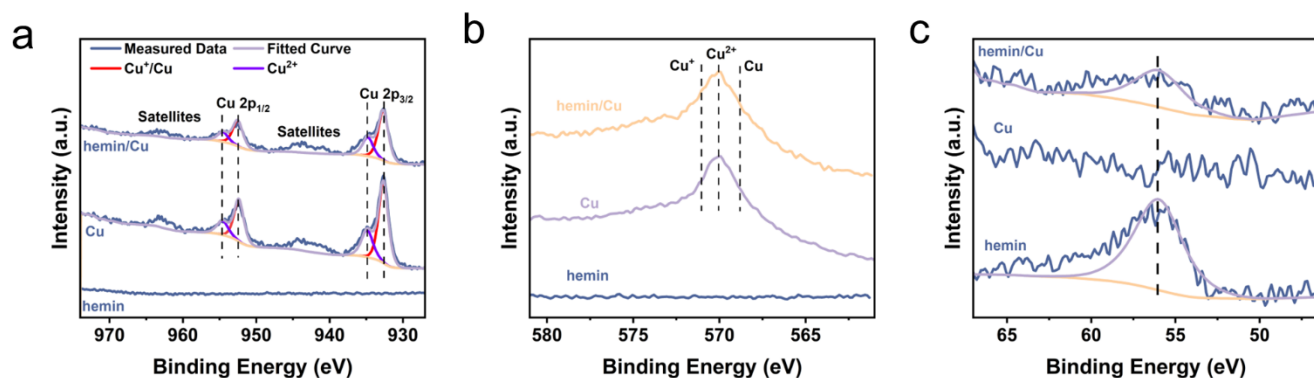

**Figure S5.** XPS spectra of the (a) Cu 2p, (b) Cu L<sub>3</sub>M<sub>4,5</sub>M<sub>4,5</sub> Auger, and (c) Fe 3p regions of hemin, Cu NPs, and hemin/Cu-6.

**Figure S6**

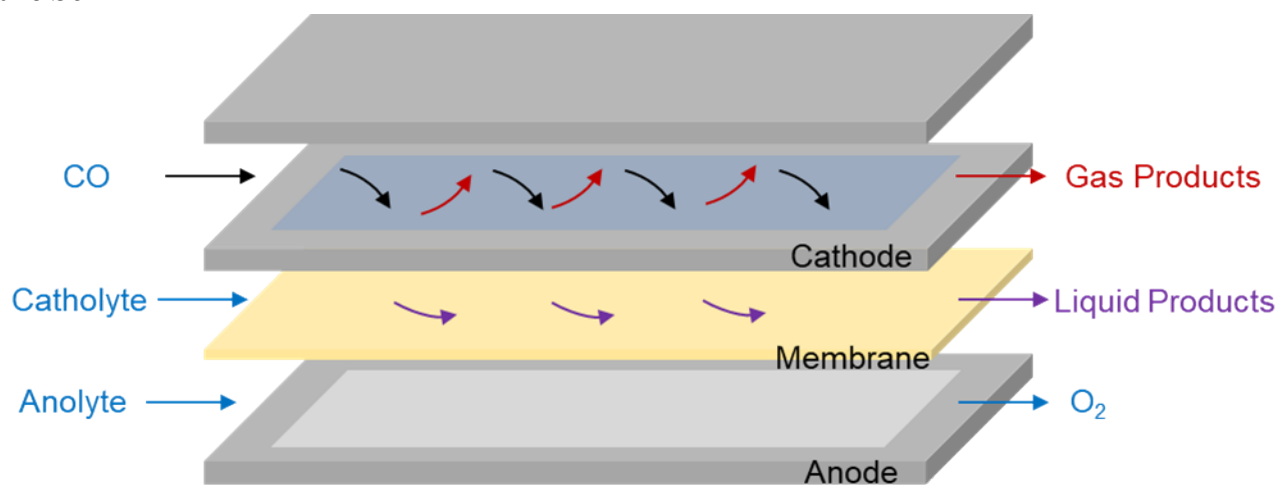

**Figure S6.** Schematic diagram of the flow cell.

Figure S7

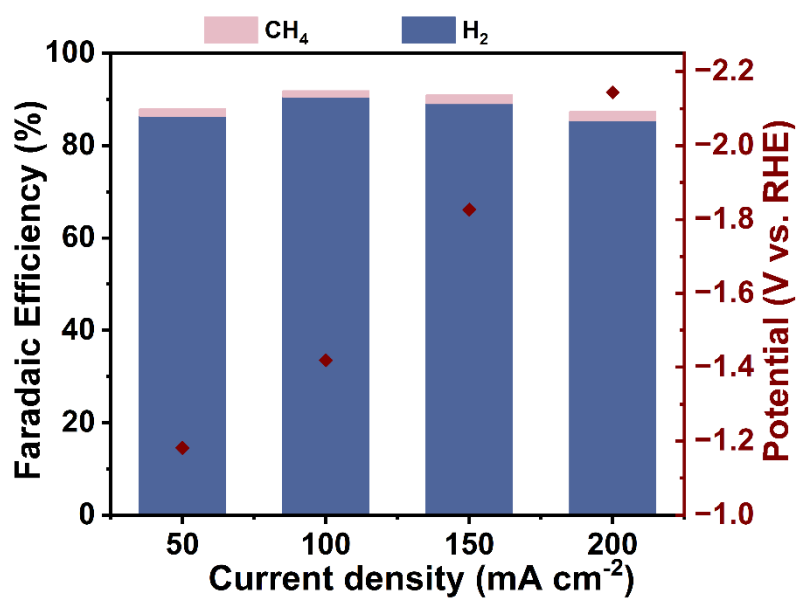

Figure S7. The FEs and potential measured for CO reduction on hemin.

Figure S8

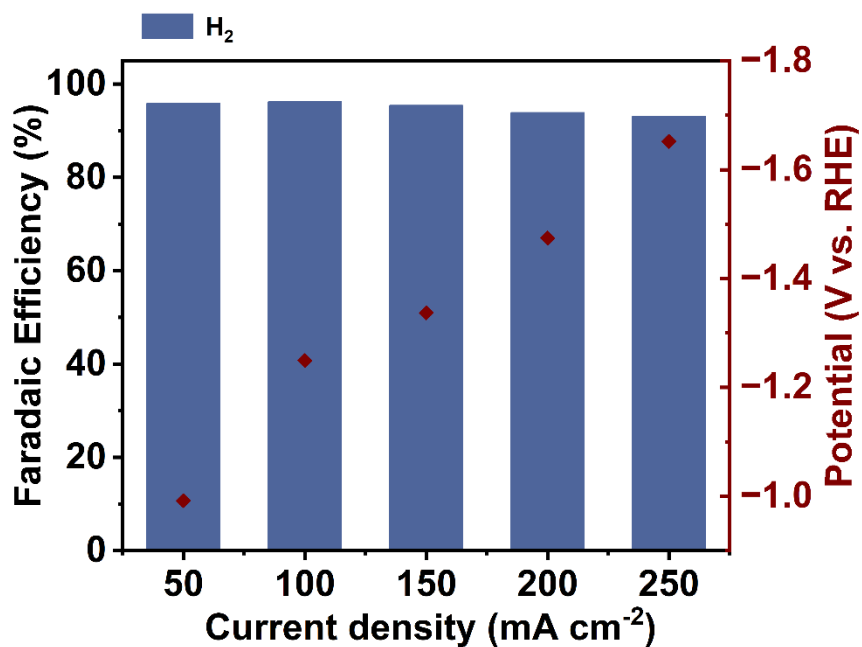

Figure S8. Electrocatalytic CO reduction product distributions of hemin/Cu-6 under Ar conditions.

Figure S9

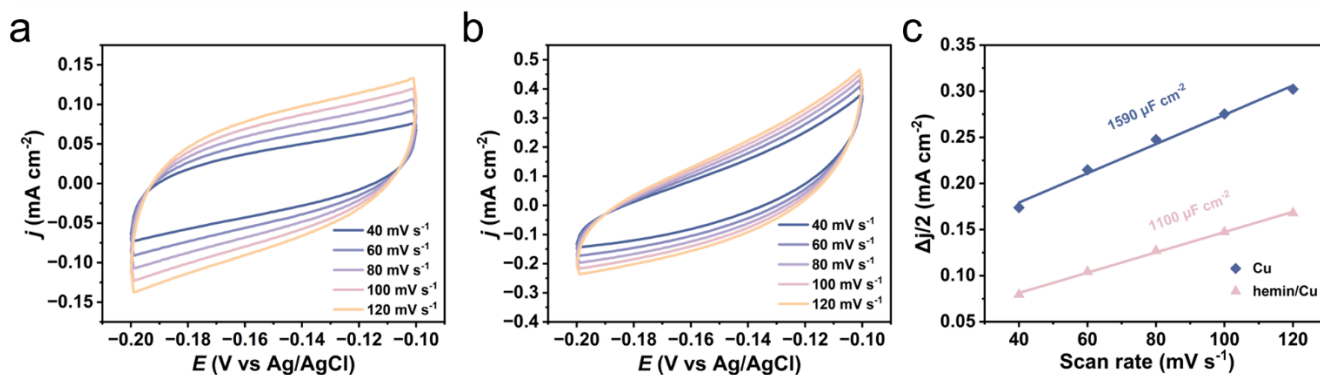

**Figure S9.** CV curves at different scan rates: (a) hemin/Cu-6 and (b) Cu NPs. (c) The capacitive current density differences at -0.15 V vs Ag/AgCl plotted against the scan rates. The ECSA is calculated using the following formula:  $A_{\text{ECSA}} = C_{\text{dl}} / (29 \mu\text{F cm}^{-2} \text{ per cm}^2_{\text{ECSA}})$ . The ECSA determined by the CV method for hemin/Cu:  $A_{\text{ECSA}} = (1100 \mu\text{F cm}^{-2}) / (29 \mu\text{F cm}^{-2} \text{ per cm}^2_{\text{ECSA}}) = 37.9 \text{ cm}^2_{\text{ECSA}}$ . The ECSA determined by the CV method for Cu NPs:  $A_{\text{ECSA}} = (1590 \mu\text{F cm}^{-2}) / (29 \mu\text{F cm}^{-2} \text{ per cm}^2_{\text{ECSA}}) = 54.8 \text{ cm}^2_{\text{ECSA}}$ .

Figure S10

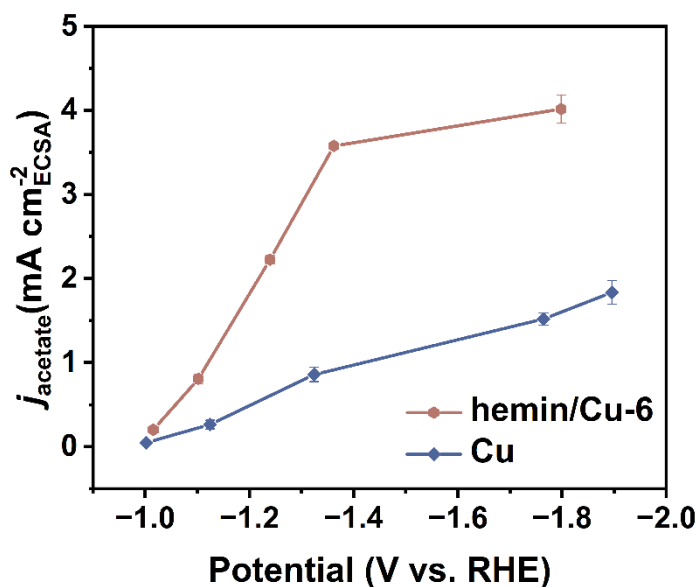

**Figure S10.** The normalized partial current densities towards acetate at different potentials of hemin/Cu-6 and Cu NPs.

**Figure S11**

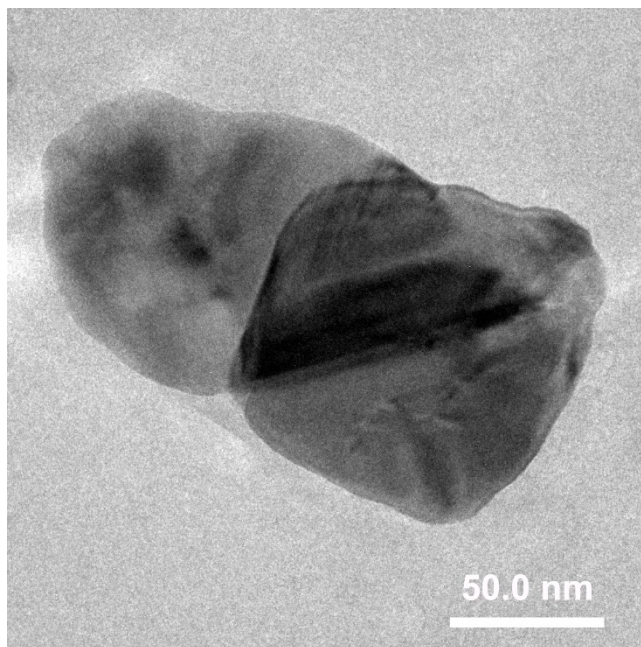

**Figure S11.** TEM image of hemin/Cu-6 after electrocatalysis test.



**Figure S12**

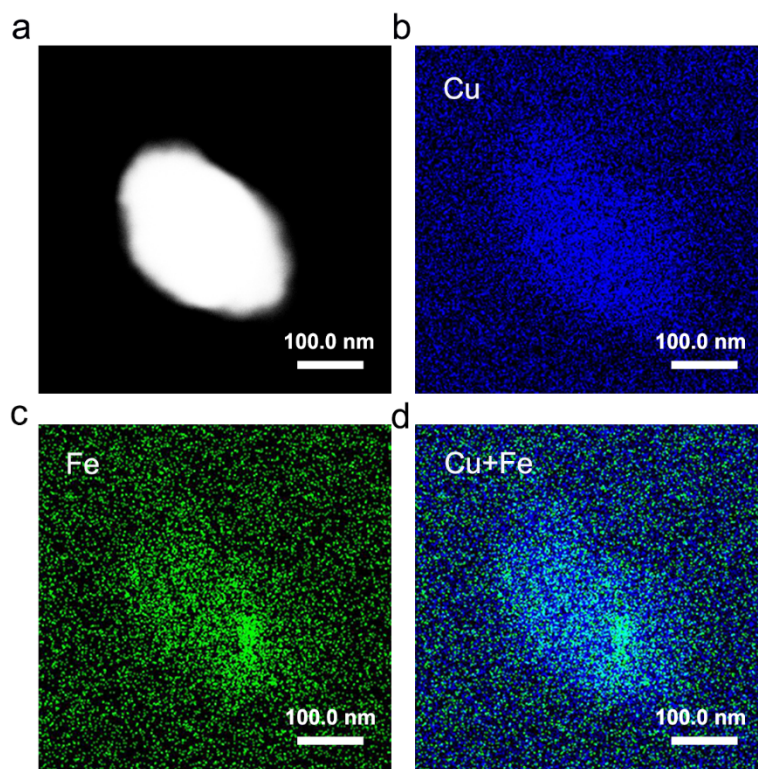

**Figure S12.** HAADF-STEM image and corresponding EDS mapping of hemin/Cu-6 catalysts after electrocatalysis test.

Figure S13

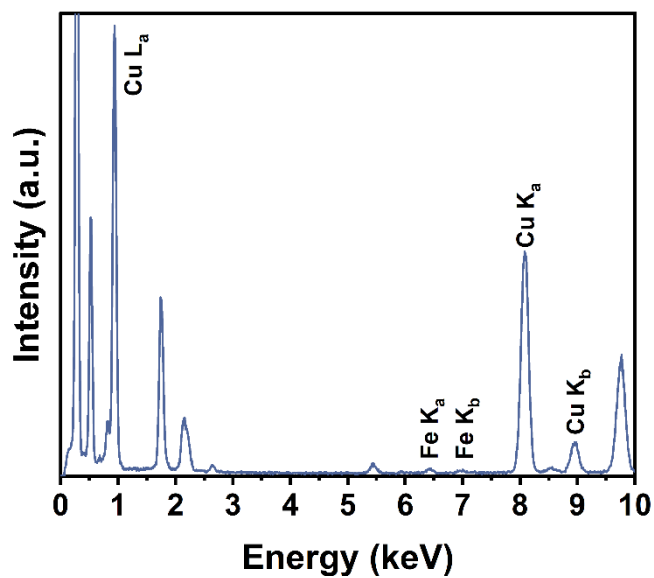

Figure S13. EDS spectrum of hemin/Cu-6 catalysts after electrocatalysis test.

Figure S14

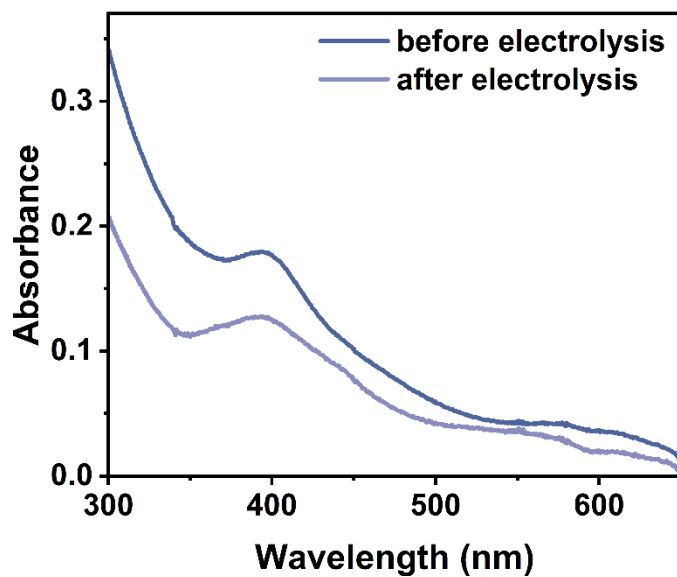

Figure S14. UV-vis spectroscopy of dissolved hemin from the fresh and used hemin/Cu-6 modified electrodes.

Figure S15

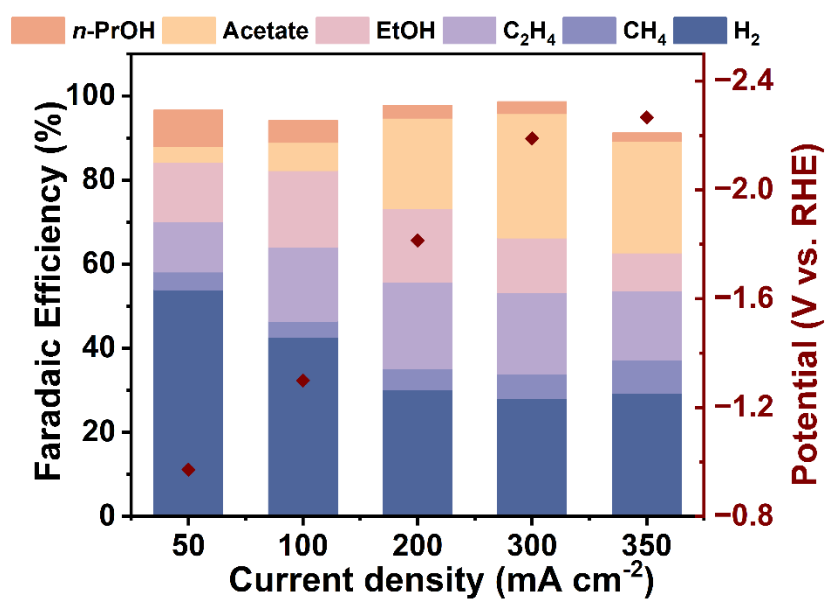

Figure S15. The product distribution at different current densities over protoporphyrin/Cu electrode.

Figure S16

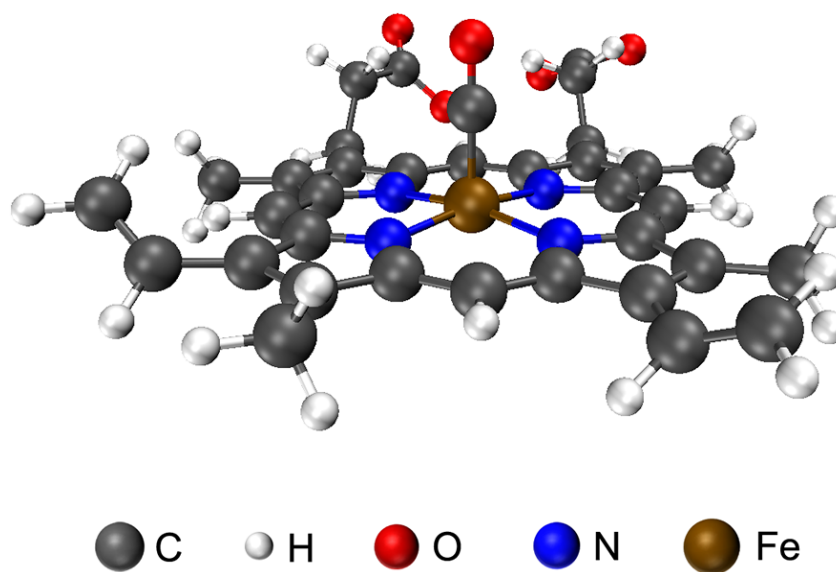

Figure S16. Optimized structures of heme-CO complex.

Figure S17

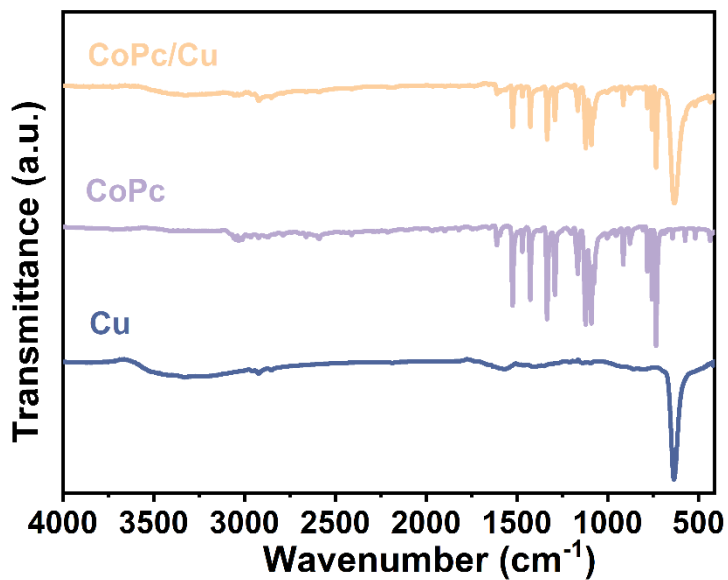

Figure S17. FTIR spectra of Cu, CoPc, and CoPc/Cu-6.

Figure S18

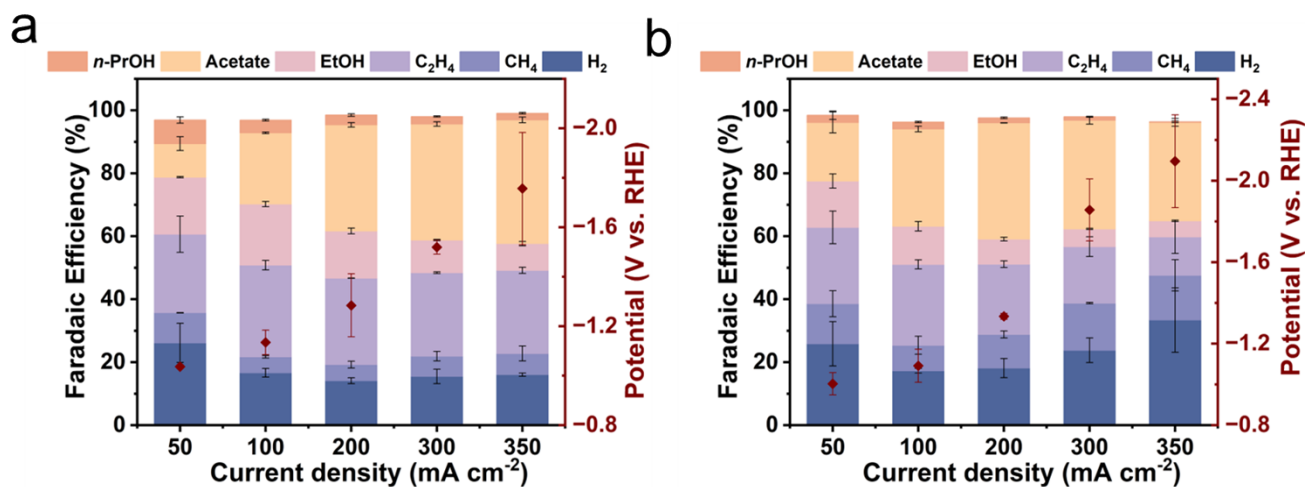

Figure S18. FEs and potentials measured for the electroreduction of CO on (a) CoPc/Cu-20, (b) CoPc/Cu-1.

**Table S1**Comparison of electrochemical CO/CO<sub>2</sub>-to-acetate performances with state-of-the-art Cu based catalysts.

| Catalysts                                     | CO/CO <sub>2</sub> | Electrolyzers | Electrolyte               | FE <sub>acetate</sub><br>(%) | J <sub>acetate</sub><br>(mA cm <sup>-2</sup> ) | ref.      |
|-----------------------------------------------|--------------------|---------------|---------------------------|------------------------------|------------------------------------------------|-----------|
| hemin/Cu-6                                    | CO                 | Flow cell     | 1 M KHCO <sub>3</sub>     | 45.2                         | ~152.3                                         | This work |
| Cu nanocube                                   | CO                 | Flow cell     | 0.5 M KHCO <sub>3</sub>   | 43                           | ~200                                           | 1         |
| (Cu) <sub>n</sub> ,(Ag) <sub>m</sub> clusters | CO <sub>2</sub>    | H cell        | 0.5 M KHCO <sub>3</sub>   | 21.2                         | N/A                                            | 2         |
| OD-Cu                                         | CO                 | Flow cell     | 0.5 M KOH                 | 18.9                         | 45                                             | 3         |
|                                               |                    |               | 1 M KOH                   | 29.6                         | 105                                            |           |
|                                               |                    |               | 2 M KOH                   | 31.8                         | 97.92                                          |           |
| Cu-Au                                         | CO                 | Flow cell     | 1 M KOH                   | 39                           | 217                                            | 4         |
|                                               |                    |               | 0.5 M KOH                 | 25                           | 25                                             |           |
| Cu nanosheets                                 | CO                 | Flow cell     | 1 M KOH                   | 33.1                         | 33.1                                           | 5         |
|                                               |                    |               | 2 M KOH                   | 48                           | 131                                            |           |
|                                               |                    |               | 0.1 M KHCO <sub>3</sub>   | 6.7                          | N/A                                            |           |
| ERD-Cu                                        | CO <sub>2</sub>    | Flow cell     | 0.1 M KHCO <sub>3</sub>   | 6.7                          | N/A                                            | 6         |
| Cu Foil                                       | CO <sub>2</sub>    | Flow cell     | 0.1 M KHCO <sub>3</sub>   | 0.3                          | 7                                              | 7         |
| Mesostructured Cu                             | CO <sub>2</sub>    | Flow cell     | 0.1 M KHCO <sub>3</sub>   | 2.54                         | 0.66                                           | 8         |
| OD-Cu                                         | CO                 | H cell        | 1 M KOH                   | 61                           | N/A                                            | 9         |
|                                               |                    |               | 0.1 M KOH                 | ~18                          |                                                |           |
| Cu <sub>45.2</sub> /GDY                       | CO                 | Flow cell     | 1 M KOH                   | ~20                          | ~42                                            | 10        |
| Cu-N-C single site catalyst                   | CO                 | Flow cell     | 1 M KOH                   | 30                           | 48                                             | 11        |
| Cu                                            | CO                 | Flow cell     | 1 M KOH                   | 16.3                         | 81.5                                           | 12        |
| CuTCPP@Cu(OH) <sub>2</sub>                    | CO <sub>2</sub>    | H cell        | 0.5 M EMIMBF <sub>4</sub> | 26.1                         | N/A                                            | 13        |

<sup>a</sup> N/A=Not available from this source.

## 2 Supporting references

1. P. Zhu, C. Xia, C.-Y. Liu, K. Jiang, G. Gao, X. Zhang, Y. Xia, Y. Lei, H. N. Alshareef, T. P. Senftle and H. Wang, *Proc. Natl. Acad. Sci. U. S. A.*, 2021, **118**, e2010868118.
2. Y. Wang, D. Wang, C. J. Dares, S. L. Marquard, M. V. Sheridan and T. J. Meyer, *Proc. Natl. Acad. Sci. U. S. A.*, 2018, **115**, 278-283.
3. M. Jouny, W. Luc and F. Jiao, *Nat. Catal.*, 2018, **1**, 748-755.
4. Q. Sun, Y. Zhao, X. Tan, C. Jia, Z. Su, Q. Meyer, M. I. Ahmed and C. Zhao, *ACS Catal.*, 2023, **13**, 5689-5696.
5. W. Luc, X. Fu, J. Shi, J.-J. Lv, M. Jouny, B. H. Ko, Y. Xu, Q. Tu, X. Hu, J. Wu, Q. Yue, Y. Liu, F. Jiao and Y. Kang, *Nat. Catal.*, 2019, **2**, 423-430.
6. P. De Luna, R. Quintero-Bermudez, C.-T. Dinh, M. B. Ross, O. S. Bushuyev, P. Todorović, T. Regier, S. O. Kelley, P. Yang and E. H. Sargent, *Nat. Catal.*, 2018, **1**, 103-110.
7. K. P. Kuhl, E. R. Cave, D. N. Abram and T. F. Jaramillo, *Energy Environ. Sci.*, 2012, **5**, 7050-7059.
8. T. Kim, A. Kargar, Y. Luo, R. Mohammed, E. Martinez-Loran, A. Ganapathi, P. Shah and D. P. Fenning, *ACS Appl. Energy Mater.*, 2018, **1**, 1965-1972.
9. C. W. Li, J. Ciston and M. W. Kanan, *Nature*, 2014, **508**, 504-507.
10. W. Rong, H. Zou, W. Zang, S. Xi, S. Wei, B. Long, J. Hu, Y. Ji and L. Duan, *Angew. Chem. Int. Ed.*, 2021, **60**, 466-472.
11. X. Fu, Y. Wang, H. Shen, Y. Yu, F. Xu, G. Zhou, W. Xie, R. Qin, C. Dun, C. W. Pao, J. L. Chen, Y. Liu, J. Guo, Q. Yue, J. J. Urban, C. Wang and Y. Kang, *Mater. Today Phys.*, 2021, **19**, 100418.
12. M. Jouny, J.-J. Lv, T. Cheng, B. H. Ko, J.-J. Zhu, W. A. Goddard and F. Jiao, *Nat. Chem.*, 2019, **11**, 846-851.
13. Y.-H. Xiao, Y.-X. Zhang, R. Zhai, Z.-G. Gu and J. Zhang, *Sci. China Mater.*, 2022, **65**, 1269-1275.
